# Supplementary material for: Socioeconomic status and central adiposity as determinants of stress-related biological responses relevant to cardiovascular disease risk
Source: PubMed Central journal article supplement (PMC6417991; doi:10.1016/j.bbi.2018.11.019), 2019-03
Supplement: mmc1.pdf [file mmc1.pdf]

**Socioeconomic status and central adiposity as determinants of stress-related biological responses relevant to cardiovascular disease risk**

**Supplementary table 1**

**Analyses based on continuously distributed waist-hip ratio**

| <b>Variable</b>                  | <b>Differences from categorical analysis</b> | <b>Statistics</b><br>Standardised regression ( $\beta$ ), standard error (SE), $p$ value |
|----------------------------------|----------------------------------------------|------------------------------------------------------------------------------------------|
| <i>Baseline / resting values</i> |                                              |                                                                                          |
| Systolic BP                      | No difference                                |                                                                                          |
| Diastolic BP                     | No difference                                |                                                                                          |
| Heart rate                       | No difference                                |                                                                                          |
| Heart rate variability           | No difference                                |                                                                                          |
| Plasma IL-6                      | No difference                                |                                                                                          |
| Plasma fibrinogen                | SES by WHR not significant                   | $\beta = 0.198$ , SE = 0.109, $p = 0.07$                                                 |
| C-reactive protein               | SES by WHR not significant                   | $\beta = 0.104$ , SE = 0.110, $p = 0.35$                                                 |
| Salivary cortisol                | No difference                                |                                                                                          |
| HbA1c                            | No difference                                |                                                                                          |
| CMV serostatus                   | No difference                                |                                                                                          |
| <i>Reactivity / recovery</i>     |                                              |                                                                                          |
| Systolic BP                      | No difference                                |                                                                                          |
| Diastolic BP                     | SES by WHR not significant                   | $\beta = 0.012$ , SE = 0.092, $p = 0.89$                                                 |
| Heart rate                       | No difference                                |                                                                                          |
| Heart rate variability           | No difference                                |                                                                                          |
| Plasma IL-6                      | No difference                                |                                                                                          |
| Plasma fibrinogen                | No difference                                |                                                                                          |
| Salivary cortisol                | No difference                                |                                                                                          |
| <i>Values over the day</i>       |                                              |                                                                                          |
| Salivary cortisol                | No difference                                |                                                                                          |

**Supplementary table 2**  
**Unadjusted analyses of SES and WHR**

| <b>Variable</b>                  | <b>Differences from categorical analysis</b>                       | <b>Statistics</b><br>F ratios and <i>p</i> values |
|----------------------------------|--------------------------------------------------------------------|---------------------------------------------------|
| <i>Baseline / resting values</i> |                                                                    |                                                   |
| Systolic BP                      | No difference                                                      |                                                   |
| Diastolic BP                     | No difference                                                      |                                                   |
| Heart rate                       | No difference                                                      |                                                   |
| Heart rate variability           | Lower HRV in greater WHR group                                     | F(1,440) = 4.58, <i>p</i> = 0.033                 |
| Plasma IL-6                      | Higher IL-6 in greater WHR group                                   | F(1,513) = 11.56, <i>p</i> = 0.001                |
| Plasma fibrinogen                | No difference                                                      |                                                   |
| C-reactive protein               | No difference                                                      |                                                   |
| Salivary cortisol                | No difference                                                      |                                                   |
| HbA1c                            | No difference                                                      |                                                   |
| CMV serostatus                   | No difference                                                      |                                                   |
| <i>Reactivity / recovery</i>     |                                                                    |                                                   |
| Systolic BP                      | WHR by trial interaction, with poorer recovery in higher WHR group | F(3, 1536) = 3.21, <i>p</i> = 0.036               |
| Diastolic BP                     | No difference                                                      |                                                   |
| Heart rate                       | No difference                                                      |                                                   |
| Heart rate variability           | No difference                                                      |                                                   |
| Plasma IL-6                      | Main effect of WHR, but no WHR by trial interaction                | F(1,497) = 7.66, <i>p</i> = 0.006                 |
| Plasma fibrinogen                | No difference                                                      |                                                   |
| Salivary cortisol                | No difference                                                      |                                                   |
| <i>Values over the day</i>       |                                                                    |                                                   |
| Salivary cortisol                | No difference                                                      |                                                   |
